# Supplementary material
Source: MDPI journal article supplement (https://www.mdpi.com/2073-4395/13/1/214)
Supplement: s1 [file s1]

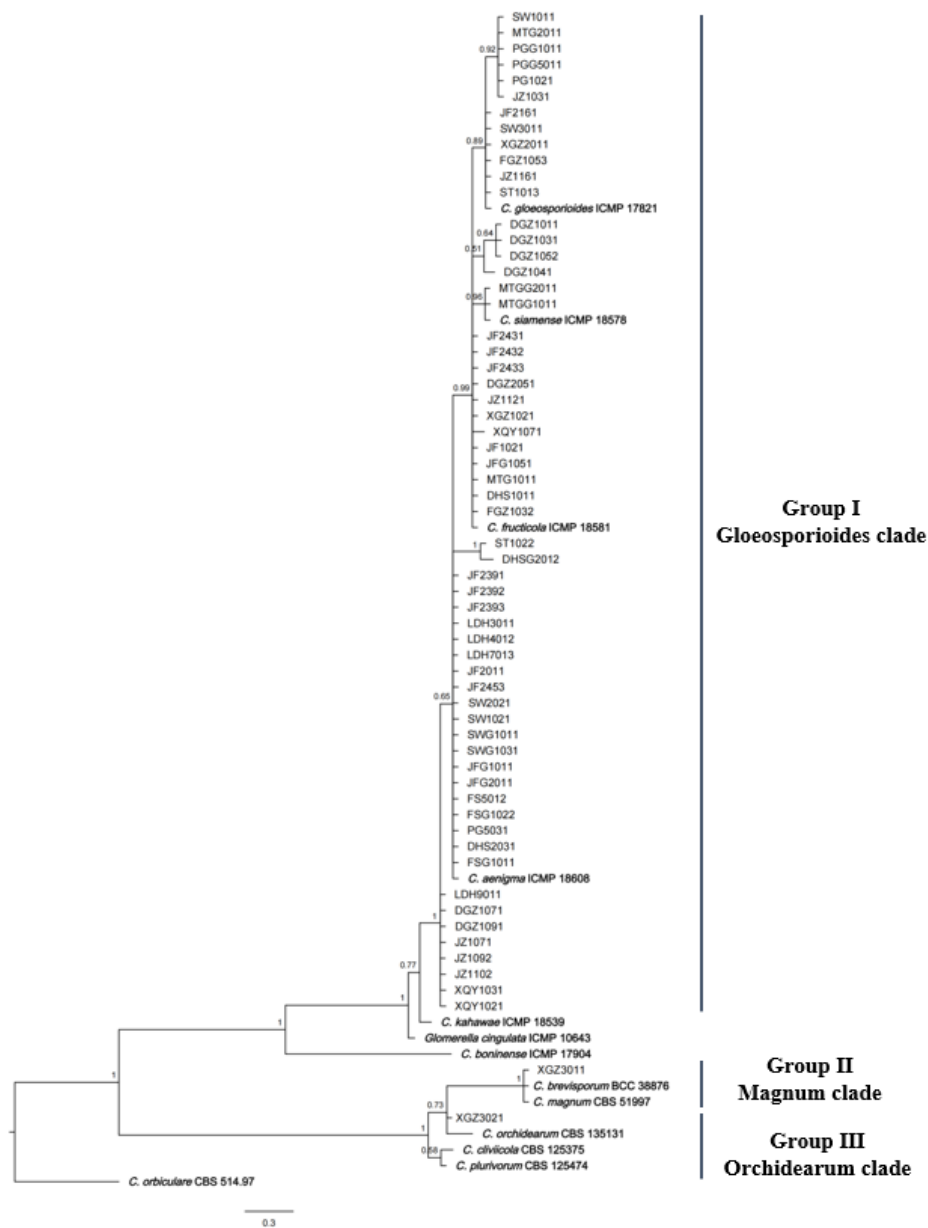

**Figure S1.** Phylogenetic tree based on ITS sequences from 74 *Colletotrichum* isolates of walnut anthracnose obtained in this study.

**Table S1.** Grading standard for diseased degree on walnut leaves.

| Level | Lesion area | Representative |
|-------|-------------|----------------|
| 0     | No lesion   | 0              |
| I     | 0 - 8%      | 1              |
| II    | 8% - 16%    | 2              |
| III   | 16% - 24%   | 3              |
| IV    | 24% - 32%   | 4              |
| V     | above 32%   | 5              |

**Table S2.** Grading standard for diseased degree on walnut fruits.

| Level | Lesion area | Representative |
|-------|-------------|----------------|
| 0     | No lesion   | 0              |
| I     | 0 - 20%     | 1              |
| II    | 20% - 40%   | 2              |
| III   | 40% - 60%   | 3              |
| IV    | 60% - 80%   | 4              |
| V     | above 80%   | 5              |

**Table S3.** Model strains and sequences of *Colletotrichum* used in this study for phylogenetic analysis.

| Species                | Culture*     | Host                       | Country     | GenBank accession number |          |          |          |          |          |
|------------------------|--------------|----------------------------|-------------|--------------------------|----------|----------|----------|----------|----------|
|                        |              |                            |             | ITS                      | GAPDH    | CAL      | ACT      | CHS-1    | TUB2     |
| <i>C. acutatum</i>     | CBS 112996*  | <i>Carica papaya</i>       | Australia   | JQ005776                 | JQ948677 |          | JQ005839 | JQ005797 | JQ005860 |
| <i>C. aenigma</i>      | ICMP 18608*  | <i>Persea</i>              | Israel      | JX010244                 | JX010044 | JX009683 | JX009443 | JX009774 | JX010389 |
|                        |              | <i>americana</i>           |             |                          |          |          |          |          |          |
|                        | ICMP 18686   | <i>Pyrus pyrifolia</i>     | Japan       | JX010243                 | JX009913 | JX009684 | JX009519 | JX009789 | JX010390 |
| <i>C. aeshynomenes</i> | ICMP 17673*  | <i>Aeshynomene</i>         | USA         | JX010176                 | JX009930 | JX009721 | JX009483 | JX009799 | JX010392 |
|                        |              | <i>virginica</i>           |             |                          |          |          |          |          |          |
| <i>C. alatae</i>       | CBS 304.67*  | <i>Dioscorea alata</i>     | India       | JX010190                 | JX009990 | JX009738 | JX009471 | JX009837 | JX010383 |
| <i>C. alienum</i>      | ICMP 18691   | <i>Persea</i>              | Australia   | JX010217                 | JX010018 | JX009664 | JX009580 | JX009754 | JX010385 |
|                        |              | <i>americana</i>           |             |                          |          |          |          |          |          |
|                        | ICMP 12071*  | <i>Malus</i>               | New Zealand | JX010251                 | JX010028 | JX009654 | JX009572 | JX009882 | JX010411 |
|                        |              | <i>domestica</i>           |             |                          |          |          |          |          |          |
| <i>C. aotearoa</i>     | ICMP 18537*  | <i>Coprosma</i> sp.        | New Zealand | JX010205                 | JX010005 | JX009611 | JX009564 | JX009853 | JX010420 |
| <i>C. asianum</i>      | ICMP 18580*  | <i>Coffea arabica</i>      | Thailand    | FJ972612                 | JX010053 | FJ917506 | JX009584 | JX009867 | JX010406 |
| <i>C. boninense</i>    | MAFF 305972* | <i>Crinum</i>              | Japan       | JX010292                 | JX009905 |          | JX009583 | JX009827 |          |
|                        |              | <i>asiaticum</i>           |             |                          |          |          |          |          |          |
|                        |              | var.sinicum                |             |                          |          |          |          |          |          |
|                        | CBS 123755*  | <i>Crinum</i>              | Japan       | JQ005153                 | JQ005240 | JQ005674 | JQ005501 | JQ005327 | JQ005588 |
|                        |              | <i>asiaticum</i>           |             |                          |          |          |          |          |          |
|                        |              | var.sinicum                |             |                          |          |          |          |          |          |
| <i>C. brevisporum</i>  | BCC 38876*   | <i>Neoregalia</i> sp. leaf | Thailand    | JN050238                 | JN050227 |          | JN050216 |          | JN050244 |

|                                                                          |                   |                                          |                |          |          |          |          |          |          |
|--------------------------------------------------------------------------|-------------------|------------------------------------------|----------------|----------|----------|----------|----------|----------|----------|
| <i>C. cacao</i>                                                          | CBS 119297*       | <i>Theobroma cacao</i>                   | Costa Rica     | MG600772 | MG600832 |          | MG600976 | MG600878 | MG601039 |
| <i>C. cattleyicola</i>                                                   | CBS 170.49*       | <i>Cattleya</i> sp.                      | Belgium        | MG600758 | MG600819 |          | MG600963 | MG600866 | MG601025 |
| <i>C. clidemiae</i>                                                      | ICMP 18658*       | <i>Clidemia hirta</i>                    | USA,<br>Hawaii | JX010265 | JX009989 | JX009645 | JX009537 | JX009877 | JX010438 |
| <i>C. cliviicola</i>                                                     | CBS 125375*       | <i>Clivia miniata</i>                    | China          | MG600733 | MG600795 |          | MG600939 | MG600850 | MG601000 |
| <i>C. cordylinicola</i>                                                  | MFLUCC<br>090551* | <i>Cordyline fruticosa</i>               | Thailand       | JX010226 | JX009975 | HM470238 | HM470235 | JX009864 | JX010440 |
| <i>C. dematium</i>                                                       | CBS 125.25*       | <i>Eryngium campestre</i> ,<br>dead leaf | France         | GU227819 | GU228211 |          | GU227917 | GU228309 | GU228113 |
| <i>C. fiorinia</i>                                                       | CBS 124958        | <i>Pyrus</i> sp.,<br>fruit rot           | USA            | JQ948306 | JQ948636 |          | JQ949627 | JQ948967 | JQ949957 |
| <i>C. fructicola</i>                                                     | CBS 125395        | <i>Theobroma cacao</i>                   | Panama         | JX010172 | JX009992 | JX009666 | JX009543 | JX009873 | JX010408 |
|                                                                          | ICMP 18581*       | <i>Coffea arabica</i>                    | Thailand       | JX010165 | JX010033 | FJ917508 | FJ907426 | JX009866 | JX010405 |
|                                                                          | ICMP 18727        | <i>Fragaria</i> ×<br><i>ananassa</i>     | USA            | JX010179 | JX010035 | JX009682 | JX009565 | JX009812 | JX010394 |
| <i>C. fructicola</i> (syn. <i>C. ignotum</i> )                           | CBS 125397(*)     | <i>Tetragastris panamensis</i>           | Panama         | JX010173 | JX010032 | JX009674 | JX009581 | JX009874 | JX010409 |
| <i>C. fructicola</i><br>(syn. <i>Glomerella cingulata</i><br>var. minor) | CBS 238.49(*)     | <i>Ficus edulis</i>                      | Germany        | JX010181 | JX009923 | JX009671 | JX009495 | JX009839 | JX010400 |
| <i>C. gloeosporioides</i>                                                | IMI 356878*       | <i>Citrus sinensis</i>                   | Italy          | JX010152 | JX010056 | JX009731 | JX009531 | JX009818 | JX010445 |
| <i>C. gloeosporioides</i><br>(syn.                                       | CBS 273.51(*)     | <i>Citrus limon</i>                      | Italy          | JX010148 | JX010054 | JX009745 | JX009558 | JX009903 |          |

|                                                                                                                 |                   |                                       |             |          |          |          |          |          |          |
|-----------------------------------------------------------------------------------------------------------------|-------------------|---------------------------------------|-------------|----------|----------|----------|----------|----------|----------|
| Gloeosporium pedemontanum)                                                                                      |                   |                                       |             |          |          |          |          |          |          |
| <i>C. godetiae</i>                                                                                              | CBS 133.44*       | <i>Clarkia hybrid</i>                 | Denmark     | JQ948402 | JQ948733 |          | JQ949723 | JQ949063 | JQ950053 |
| <i>C. hippeastri</i>                                                                                            | CBS 241.78        | <i>Hippeastrum</i><br>sp.             | Netherlands | JX010293 | JX009932 | JX009740 | JX009485 | JX009838 |          |
| <i>C. horii</i>                                                                                                 | NBRC 7478*,       | <i>Diospyros kaki</i>                 | Japan       | GQ329690 | GQ329681 | JX009604 | JX009438 | JX009752 | JX010450 |
| <i>C. kahawae</i> subsp.<br>ciggaro                                                                             | ICMP 18539*       | <i>Olea europaea</i>                  | Australia   | JX010230 | JX009966 | JX009635 | JX009523 | JX009800 | JX010434 |
| <i>C. kahawae</i> subsp.<br>ciggaro<br>(syn. <i>Glomerella</i><br><i>rufomaculans</i> var.<br><i>vaccinii</i> ) | CBS 124.22(*)     | <i>Vaccinium</i> sp.                  | USA         | JX010228 | JX009950 | JX009744 | JX009536 | JX009902 | JX010433 |
| <i>C. kahawae</i> subsp.<br>ciggaro<br>(syn. <i>Glomerella</i><br><i>cingulata</i> var.<br><i>migrans</i> )     | CBS 237.49(*)     | <i>Hypericum</i><br><i>perforatum</i> | Germany     | JX010238 | JX010042 | JX009636 | JX009450 | JX009840 | JX010432 |
| <i>C. kahawae</i> subsp.<br>kahawae                                                                             | IMI 319418*       | <i>Coffea arabica</i>                 | Kenya       | JX010231 | JX010012 | JX009642 | JX009452 | JX009813 | JX010444 |
| <i>C. liaoningense</i>                                                                                          | CGMCC<br>3.17616* | <i>Capsicum</i> sp.                   | China       | KP890104 | KP890135 |          | KP890097 | KP890127 | KP890111 |
| <i>C. magnum</i>                                                                                                | CBS 519.97*       | <i>Citrullus</i><br><i>lanatus</i>    | USA         | MG600769 | MG600829 |          | MG600973 | MG600875 | MG601036 |
| <i>C. musae</i>                                                                                                 | CBS 116870*       | <i>Musa</i> sp.                       | USA         | JX010146 | JX010050 | JX009742 | JX009433 | JX009896 | HQ596280 |
| <i>C. musicola</i>                                                                                              | CBS 132885*       | <i>Musa</i> sp.                       | Mexico      | MG600736 | MG600798 |          | MG600942 | MG600853 | MG601003 |
| <i>C. okinawense</i>                                                                                            | MAFF 240517       | <i>Carica papaya</i>                  | Japan       | MG600767 | MG600827 |          | MG600971 |          | MG601034 |

|                          |               |                                            |             |          |          |          |          |          |          |
|--------------------------|---------------|--------------------------------------------|-------------|----------|----------|----------|----------|----------|----------|
| <i>C. orbiculare</i>     | CBS 514.97    | <i>Cucumis sativus</i>                     | Japan       | JQ005778 | KF178491 |          | JQ005841 | JQ005799 | JQ005862 |
| <i>C. orchidearum</i>    | CBS 135131*   | <i>Dendrobium nobile</i>                   | Netherlands | MG600738 | MG600800 |          | MG600944 | MG600855 | MG601005 |
| <i>C. panamense</i>      | CBS 125386*   | <i>Merremia umbellata</i>                  | Panama      | MG600766 | MG600826 |          | MG600970 | MG600873 | MG601033 |
| <i>C. phyllanthi</i>     | CBS 175.67*   | <i>Phyllanthus acidus</i> ,<br>anthracnose | India       | JQ005221 | JQ005308 | JQ005742 | JQ005569 | JQ005395 | JQ005655 |
| <i>C. piperis</i>        | IMI 71397*    | <i>Piper nigrum</i>                        | Malaysia    | MG600760 | MG600820 |          | MG600964 | MG600867 | MG601027 |
| <i>C. plurivorum</i>     | CBS 125474*   | <i>Coffea</i> sp.                          | Vietnam     | MG600718 | MG600781 |          | MG600925 | MG600841 | MG600985 |
| <i>C. psidii</i>         | CBS 145.29*   | <i>Psidium</i> sp.                         | Italy       | JX010219 | JX009967 | JX009743 | JX009515 | JX009901 | JX010443 |
| <i>C. queenslandicum</i> | ICMP 1778*    | <i>Carica papaya</i>                       | Australia   | JX010276 | JX009934 | JX009691 | JX009447 | JX009899 | JX010414 |
| <i>C. salsolae</i>       | ICMP 19051*   | <i>Salsola tragus</i>                      | Hungary     | JX010242 | JX009916 | JX009696 | JX009562 | JX009863 | JX010403 |
| <i>C. siamense</i>       | ICMP 18578*   | <i>Coffea arabica</i>                      | Thailand    | JX010171 | JX009924 | FJ917505 | FJ907423 | JX009865 | JX010404 |
| <i>C. siamense</i>       | CBS 125378(*) | <i>Hymenocallis americana</i>              | China       | JX010278 | JX010019 | JX009709 | GQ856775 | GQ856730 | JX010410 |
| <i>C. siamense</i>       | CBS 130420(*) | <i>Jasminum sambac</i>                     | Vietnam     | HM131511 | HM131497 | JX009713 | HM131507 | JX009895 | JX010415 |
| <i>C. sojae</i>          | ATCC 62257*   | <i>Glycine max</i>                         | USA         | MG600749 | MG600810 |          | MG600954 | MG600860 | MG601016 |
| <i>C. theobromicola</i>  | CBS 124945*   | <i>Theobroma cacao</i>                     | Panama      | JX010294 | JX010006 | JX009591 | JX009444 | JX009869 | JX010447 |
| <i>C. ti</i>             | ICMP 4832*    | <i>Cordyline</i> sp.                       | New Zealand | JX010269 | JX009952 | JX009649 | JX009520 | JX009898 | JX010442 |
| <i>C. tropicale</i>      | CBS 124949*   | <i>Theobroma cacao</i>                     | Panama      | JX010264 | JX010007 | JX009719 | JX009489 | JX009870 | JX010407 |

|                                                          |               |                                           |              |          |          |          |          |          |          |
|----------------------------------------------------------|---------------|-------------------------------------------|--------------|----------|----------|----------|----------|----------|----------|
| <i>C. viniferum</i>                                      | GZAAS5.08601* | <i>Vitis vinifera</i> ,<br>cv. 'Shuijing' | China        | JN412804 | JN412798 | JQ309639 | JN412795 |          | JN412813 |
| <i>C. xanthorrhoeae</i>                                  | BRIP 45094*   | <i>Xanthorrhoea</i><br><i>preissii</i>    | Australia    | JX010261 | JX009927 | JX009653 | JX009478 | JX009823 | JX010448 |
| <i>Glomerella cingulata</i><br>"f.sp. <i>camelliae</i> " | ICMP 10643    | <i>Camellia</i> ×<br><i>williamsii</i>    | UK           | JX010224 | JX009908 | JX009630 | JX009540 | JX009891 | JX010436 |
| <i>Monilochaetes</i><br><i>infuscans</i>                 | CBS 869.96*   | <i>Ipomoea</i><br><i>batatas</i>          | South Africa | JQ005780 | JX546612 |          | JQ005843 | JQ005801 | JQ005864 |

---

\* = ex-type culture

**Table S4.** List of 61 representative isolates of *Colletotrichum* spp. uploaded to NCBI.

| Species                   | Isolate No. | Host                          | Country | GenBank accession number |          |          |          |          |          |
|---------------------------|-------------|-------------------------------|---------|--------------------------|----------|----------|----------|----------|----------|
|                           |             |                               |         | ACT                      | CAL      | CHS-1    | GAPDH    | ITS      | TUB2     |
| <i>C. aenigma</i>         | JF2391      | <i>Juglans regia</i> L., leaf | China   | MW783708                 | MW783767 | MW783826 | MW783885 | MW699547 | MW783944 |
|                           | JF2392      | <i>Juglans regia</i> L., leaf | China   | MW783709                 | MW783768 | MW783827 | MW783886 | MW699548 | MW783945 |
|                           | JF2393      | <i>Juglans regia</i> L., leaf | China   | MW783710                 | MW783769 | MW783828 | MW783887 | MW699549 | MW783946 |
|                           | LDH3011     | <i>Juglans regia</i> L., leaf | China   | MW783711                 | MW783770 | MW783829 | MW783888 | MW699550 | MW783947 |
|                           | LDH4012     | <i>Juglans regia</i> L., leaf | China   | MW783712                 | MW783771 | MW783830 | MW783889 | MW699551 | MW783948 |
|                           | LDH7013     | <i>Juglans regia</i> L., leaf | China   | MW783713                 | MW783772 | MW783831 | MW783890 | MW699552 | MW783949 |
|                           | LDH9011     | <i>Juglans regia</i> L., leaf | China   | MW783714                 | MW783773 | MW783832 | MW783891 | MW699553 | MW783950 |
|                           | DGZ1071     | <i>Juglans regia</i> L., leaf | China   | MW783715                 | MW783774 | MW783833 | MW783892 | MW699554 | MW783951 |
|                           | DGZ1091     | <i>Juglans regia</i> L., leaf | China   | MW783716                 | MW783775 | MW783834 | MW783893 | MW699555 | MW783952 |
|                           | JZ1071      | <i>Juglans regia</i> L., leaf | China   | MW783717                 | MW783776 | MW783835 | MW783894 | MW699556 | MW783953 |
|                           | JZ1092      | <i>Juglans regia</i> L., leaf | China   | MW783718                 | MW783777 | MW783836 | MW783895 | MW699557 | MW783954 |
|                           | JZ1102      | <i>Juglans regia</i> L., leaf | China   | MW783719                 | MW783778 | MW783837 | MW783896 | MW699558 | MW783955 |
| <i>C. fruticicola</i>     | JF2431      | <i>Juglans regia</i> L., leaf | China   | MW783720                 | MW783779 | MW783838 | MW783897 | MW699560 | MW783956 |
|                           | JF2432      | <i>Juglans regia</i> L., leaf | China   | MW783721                 | MW783780 | MW783839 | MW783898 | MW699561 | MW783957 |
|                           | JF2433      | <i>Juglans regia</i> L., leaf | China   | MW783722                 | MW783781 | MW783840 | MW783899 | MW699562 | MW783958 |
|                           | DGZ1011     | <i>Juglans regia</i> L., leaf | China   | MW783723                 | MW783782 | MW783841 | MW783900 | MW699563 | MW783959 |
|                           | DGZ1031     | <i>Juglans regia</i> L., leaf | China   | MW783724                 | MW783783 | MW783842 | MW783901 | MW699564 | MW783960 |
|                           | DGZ1052     | <i>Juglans regia</i> L., leaf | China   | MW783725                 | MW783784 | MW783843 | MW783902 | MW699565 | MW783961 |
|                           | DGZ2051     | <i>Juglans regia</i> L., leaf | China   | MW783726                 | MW783785 | MW783844 | MW783903 | MW699566 | MW783962 |
|                           | JZ1121      | <i>Juglans regia</i> L., leaf | China   | MW783727                 | MW783786 | MW783845 | MW783904 | MW699567 | MW783963 |
|                           | XGZ1021     | <i>Juglans regia</i> L., leaf | China   | MW783728                 | MW783787 | MW783846 | MW783905 | MW699568 | MW783964 |
| <i>C. gloeosporioides</i> | JF1021      | <i>Juglans regia</i> L., leaf | China   | MW783729                 | MW783788 | MW783847 | MW783906 | MW699572 | MW783965 |
|                           | JF2161      | <i>Juglans regia</i> L., leaf | China   | MW783730                 | MW783789 | MW783848 | MW783907 | MW699573 | MW783966 |



|                    |          |                                |       |          |          |          |          |          |          |
|--------------------|----------|--------------------------------|-------|----------|----------|----------|----------|----------|----------|
| <i>C. siamense</i> | SW1011   | <i>Juglans regia</i> L., leaf  | China | MW783731 | MW783790 | MW783849 | MW783908 | MW699574 | MW783967 |
|                    | SW3011   | <i>Juglans regia</i> L., leaf  | China | MW783732 | MW783791 | MW783850 | MW783909 | MW699575 | MW783968 |
|                    | JFG1051  | <i>Juglans regia</i> L., fruit | China | MW783733 | MW783792 | MW783851 | MW783910 | MW699576 | MW783969 |
|                    | MTG1011  | <i>Juglans regia</i> L., leaf  | China | MW783734 | MW783793 | MW783852 | MW783911 | MW699577 | MW783970 |
|                    | MTG2011  | <i>Juglans regia</i> L., leaf  | China | MW783735 | MW783794 | MW783853 | MW783912 | MW699578 | MW783971 |
|                    | PGG1011  | <i>Juglans regia</i> L., fruit | China | MW783736 | MW783795 | MW783854 | MW783913 | MW699579 | MW783972 |
|                    | PGG5011  | <i>Juglans regia</i> L., fruit | China | MW783737 | MW783796 | MW783855 | MW783914 | MW699580 | MW783973 |
|                    | PG1021   | <i>Juglans regia</i> L., leaf  | China | MW783738 | MW783797 | MW783856 | MW783915 | MW699581 | MW783974 |
|                    | DHS1011  | <i>Juglans regia</i> L., leaf  | China | MW783739 | MW783798 | MW783857 | MW783916 | MW699582 | MW783975 |
|                    | XGZ2011  | <i>Juglans regia</i> L., leaf  | China | MW783740 | MW783799 | MW783858 | MW783917 | MW699583 | MW783976 |
|                    | FGZ1032  | <i>Juglans regia</i> L., leaf  | China | MW783741 | MW783800 | MW783859 | MW783918 | MW699584 | MW783977 |
|                    | FGZ1053  | <i>Juglans regia</i> L., leaf  | China | MW783742 | MW783801 | MW783860 | MW783919 | MW699585 | MW783978 |
|                    | DGZ1041  | <i>Juglans regia</i> L., leaf  | China | MW783743 | MW783802 | MW783861 | MW783920 | MW699586 | MW783979 |
|                    | JZ1031   | <i>Juglans regia</i> L., leaf  | China | MW783744 | MW783803 | MW783862 | MW783921 | MW699587 | MW783980 |
|                    | JZ1161   | <i>Juglans regia</i> L., leaf  | China | MW783745 | MW783804 | MW783863 | MW783922 | MW699588 | MW783981 |
|                    | ST1013   | <i>Juglans regia</i> L., leaf  | China | MW783746 | MW783805 | MW783864 | MW783923 | MW699589 | MW783982 |
|                    | DHSG2012 | <i>Juglans regia</i> L., fruit | China | MW783747 | MW783806 | MW783865 | MW783924 | MW699590 | MW783983 |
|                    | JF2011   | <i>Juglans regia</i> L., leaf  | China | MW783748 | MW783807 | MW783866 | MW783925 | MW699593 | MW783984 |
|                    | JF2453   | <i>Juglans regia</i> L., leaf  | China | MW783749 | MW783808 | MW783867 | MW783926 | MW699594 | MW783985 |
|                    | SW2021   | <i>Juglans regia</i> L., leaf  | China | MW783750 | MW783809 | MW783868 | MW783927 | MW699595 | MW783986 |
|                    | SW1021   | <i>Juglans regia</i> L., leaf  | China | MW783751 | MW783810 | MW783869 | MW783928 | MW699596 | MW783987 |
|                    | SWG1011  | <i>Juglans regia</i> L., fruit | China | MW783752 | MW783811 | MW783870 | MW783929 | MW699597 | MW783988 |
|                    | SWG1031  | <i>Juglans regia</i> L., fruit | China | MW783753 | MW783812 | MW783871 | MW783930 | MW699598 | MW783989 |
|                    | JFG1011  | <i>Juglans regia</i> L., fruit | China | MW783754 | MW783813 | MW783872 | MW783931 | MW699599 | MW783990 |
|                    | JFG2011  | <i>Juglans regia</i> L., fruit | China | MW783755 | MW783814 | MW783873 | MW783932 | MW699600 | MW783991 |
|                    | FS5012   | <i>Juglans regia</i> L., leaf  | China | MW783756 | MW783815 | MW783874 | MW783933 | MW699601 | MW783992 |
|                    | FSG1022  | <i>Juglans regia</i> L., fruit | China | MW783757 | MW783816 | MW783875 | MW783934 | MW699602 | MW783993 |

|                        |          |                                |       |          |          |          |          |          |          |
|------------------------|----------|--------------------------------|-------|----------|----------|----------|----------|----------|----------|
|                        | MTGG2011 | <i>Juglans regia</i> L., fruit | China | MW783758 | MW783817 | MW783876 | MW783935 | MW699603 | MW783994 |
|                        | XQY1031  | <i>Juglans regia</i> L., leaf  | China | MW783759 | MW783818 | MW783877 | MW783936 | MW699604 | MW783995 |
|                        | XQY1021  | <i>Juglans regia</i> L., leaf  | China | MW783760 | MW783819 | MW783878 | MW783937 | MW699605 | MW783996 |
|                        | MTGG1011 | <i>Juglans regia</i> L., fruit | China | MW783761 | MW783820 | MW783879 | MW783938 | MW699606 | MW783997 |
|                        | ST1022   | <i>Juglans regia</i> L., leaf  | China | MW783762 | MW783821 | MW783880 | MW783939 | MW699607 | MW783998 |
|                        | XQY1071  | <i>Juglans regia</i> L., leaf  | China | MW783763 | MW783822 | MW783881 | MW783940 | MW699608 | MW783999 |
|                        | PG5031   | <i>Juglans regia</i> L., leaf  | China | MW783764 | MW783823 | MW783882 | MW783941 | MW699609 | MW784000 |
|                        | DHS2031  | <i>Juglans regia</i> L., leaf  | China | MW783765 | MW783824 | MW783883 | MW783942 | MW699610 | MW784001 |
|                        | FSG1011  | <i>Juglans regia</i> L., fruit | China | MW783766 | MW783825 | MW783884 | MW783943 | MW699611 | MW784002 |
| <i>C. liaoningense</i> | XGZ3011  | <i>Juglans regia</i> L., leaf  | China | MW810312 |          | MW810313 | MW810314 | MW805735 | MW831310 |
| <i>C. sojaj</i>        | XGZ3021  | <i>Juglans regia</i> L., leaf  | China | MW810315 |          | MW810316 | MW810317 | MW805734 | MW810318 |

---

**Table S5.** Determination of sensitivity of walnut anthracnose to seven fungicides.

| Fungicide      | Isolate | Species                   | EC <sub>50</sub><br>( $\mu$ g/mL) | Regression equation | Correlation<br>coefficient (R) |
|----------------|---------|---------------------------|-----------------------------------|---------------------|--------------------------------|
| Difenoconazole | XGZ3011 | <i>C. liaoningense</i>    | 0.1888                            | $y=0.6696x+5.4847$  | 0.9510                         |
|                | XGZ3011 | <i>C. liaoningense</i>    | 0.0728                            | $y=0.5734x+5.6525$  | 0.9916                         |
|                | XGZ3021 | <i>C. sojae</i>           | 0.3286                            | $y=0.7922x+5.3828$  | 0.9919                         |
|                | XGZ3021 | <i>C. sojae</i>           | 0.1380                            | $y=0.6151x+5.5290$  | 0.9942                         |
|                | JF2391  | <i>C. aenigma</i>         | 0.2157                            | $y=1.1419x+5.7605$  | 0.9825                         |
|                | JF2393  | <i>C. aenigma</i>         | 0.1353                            | $y=0.9435x+5.8194$  | 0.9962                         |
|                | LDH4011 | <i>C. aenigma</i>         | 0.2318                            | $y=0.7314x+5.4644$  | 0.9346                         |
|                | LDH7011 | <i>C. aenigma</i>         | 0.2159                            | $y=0.7037x+5.4685$  | 0.9701                         |
|                | LDH3011 | <i>C. aenigma</i>         | 0.2987                            | $y=0.7775x+5.4080$  | 0.9936                         |
|                | JZ1151  | <i>C. aenigma</i>         | 0.0699                            | $y=0.7631x+5.8817$  | 0.9958                         |
|                | DGZ1071 | <i>C. aenigma</i>         | 0.1276                            | $y=0.9366x+5.8372$  | 0.9955                         |
|                | JF2432  | <i>C. fructicola</i>      | 0.1369                            | $y=0.7036x+5.6075$  | 0.9943                         |
|                | JF2433  | <i>C. fructicola</i>      | 0.0969                            | $y=0.7200x+5.7296$  | 0.9820                         |
|                | DGZ1052 | <i>C. fructicola</i>      | 0.0932                            | $y=0.6651x+5.6853$  | 0.9984                         |
|                | DGZ1011 | <i>C. fructicola</i>      | 0.0759                            | $y=1.2408x+6.3893$  | 0.9668                         |
|                | XGZ1021 | <i>C. fructicola</i>      | 0.0635                            | $y=0.5918x+5.7084$  | 0.9945                         |
|                | JZ1121  | <i>C. fructicola</i>      | 0.1006                            | $y=0.5985x+5.5968$  | 0.9924                         |
|                | JF1021  | <i>C. gloeosporioides</i> | 0.1159                            | $y=0.7699x+5.7207$  | 0.9534                         |
|                | JF2271  | <i>C. gloeosporioides</i> | 0.1163                            | $y=0.9269x+5.8660$  | 0.9653                         |
|                | JF2411  | <i>C. gloeosporioides</i> | 0.2010                            | $y=0.9311x+5.6488$  | 0.9701                         |
|                | JFG1051 | <i>C. gloeosporioides</i> | 0.1071                            | $y=0.8064x+5.7826$  | 0.8852                         |
|                | LDH9011 | <i>C. gloeosporioides</i> | 0.2438                            | $y=1.0320x+5.6324$  | 0.9893                         |

|            |         |                           |        |                     |        |
|------------|---------|---------------------------|--------|---------------------|--------|
| Prochloraz | MTG2011 | <i>C. gloeosporioides</i> | 0.1332 | $y=0.6669x+5.5837$  | 0.8989 |
|            | DGZ1041 | <i>C. gloeosporioides</i> | 0.1015 | $y=0.7908x+5.7856$  | 0.9943 |
|            | JZ1031  | <i>C. gloeosporioides</i> | 0.0914 | $y=0.8952x+5.9301$  | 0.9933 |
|            | XGZ2011 | <i>C. gloeosporioides</i> | 0.1050 | $y=0.6482x+5.6344$  | 0.9879 |
|            | FS5021  | <i>C. siamense</i>        | 0.1011 | $y=0.7921x+5.78826$ | 0.9656 |
|            | JF2011  | <i>C. siamense</i>        | 0.0940 | $y=0.9314x+5.9561$  | 0.9909 |
|            | JF2451  | <i>C. siamense</i>        | 0.1198 | $y=0.7664x+5.7062$  | 0.9701 |
|            | JFG1011 | <i>C. siamense</i>        | 0.0633 | $y=0.8059x+5.9658$  | 0.9924 |
|            | JFG1041 | <i>C. siamense</i>        | 0.1429 | $y=0.7534x+5.6365$  | 0.9886 |
|            | SWG1011 | <i>C. siamense</i>        | 0.0879 | $y=0.9132x+5.9640$  | 0.9996 |
|            | SWG3011 | <i>C. siamense</i>        | 0.1459 | $y=0.7021x+5.5867$  | 0.9927 |
|            | XQY1021 | <i>C. siamense</i>        | 0.0670 | $y=0.8577x+6.0068$  | 0.9936 |
|            | DGZ1071 | <i>C. aenigma</i>         | 0.0261 | $y=1.3920x+7.2025$  | 0.9818 |
|            | JF2391  | <i>C. aenigma</i>         | 0.0276 | $y=1.5430x+7.4034$  | 0.9920 |
|            | JF2392  | <i>C. aenigma</i>         | 0.0268 | $y=1.0779x+6.6935$  | 0.9761 |
|            | JF2393  | <i>C. aenigma</i>         | 0.0349 | $y=1.3311x+6.9381$  | 0.9967 |
|            | JZ1151  | <i>C. aenigma</i>         | 0.0240 | $y=1.4355x+7.3237$  | 0.9979 |
|            | LDH3011 | <i>C. aenigma</i>         | 0.0200 | $y=1.0896x+6.8511$  | 0.9409 |
|            | LDH4011 | <i>C. aenigma</i>         | 0.0385 | $y=1.2924x+6.8270$  | 0.9894 |
|            | LDH7011 | <i>C. aenigma</i>         | 0.0170 | $y=1.0336x+6.8274$  | 0.9057 |
|            | XGZ3011 | <i>C. liaoningense</i>    | 0.0185 | $y=0.9574x+6.6570$  | 0.9907 |
|            | XGZ3012 | <i>C. liaoningense</i>    | 0.0123 | $y=0.8540x+6.6286$  | 0.9971 |
|            | DGZ1011 | <i>C. fruticola</i>       | 0.0209 | $y=1.2723x+7.1362$  | 0.9957 |
|            | DGZ1052 | <i>C. fruticola</i>       | 0.0227 | $y=1.3686x+7.2476$  | 0.9962 |
|            | JF2432  | <i>C. fruticola</i>       | 0.0188 | $y=1.1346x+6.9562$  | 0.9904 |
|            | JF2433  | <i>C. fruticola</i>       | 0.0154 | $y=1.3645x+7.34704$ | 0.9791 |

|         |                           |        |                    |        |
|---------|---------------------------|--------|--------------------|--------|
| JF2451  | <i>C. fruticola</i>       | 0.0222 | $y=1.0863x+6.7959$ | 0.9523 |
| JZ1121  | <i>C. fruticola</i>       | 0.0251 | $y=1.0608x+6.8571$ | 0.9909 |
| XGZ1021 | <i>C. fruticola</i>       | 0.0135 | $y=1.1207x+7.0926$ | 0.9898 |
| DGZ1041 | <i>C. gloeosporioides</i> | 0.0208 | $y=1.3895x+7.3347$ | 0.9981 |
| JF1021  | <i>C. gloeosporioides</i> | 0.0185 | $y=1.1469x+6.9864$ | 0.9477 |
| JF2161  | <i>C. gloeosporioides</i> | 0.0234 | $y=1.0242x+6.6689$ | 0.9811 |
| JF2271  | <i>C. gloeosporioides</i> | 0.0187 | $y=0.8846x+6.5283$ | 0.9867 |
| JF2411  | <i>C. gloeosporioides</i> | 0.0199 | $y=1.1141x+6.8956$ | 0.9952 |
| JF2431  | <i>C. gloeosporioides</i> | 0.0160 | $y=0.9835x+6.7642$ | 0.9910 |
| JFG1051 | <i>C. gloeosporioides</i> | 0.0177 | $y=0.9134x+6.5994$ | 0.9464 |
| JZ1031  | <i>C. gloeosporioides</i> | 0.0172 | $y=1.4773x+7.6044$ | 0.9778 |
| LDH9011 | <i>C. gloeosporioides</i> | 0.0256 | $y=1.5603x+7.4837$ | 0.9851 |
| MTG1011 | <i>C. gloeosporioides</i> | 0.0164 | $y=0.8322x+6.4855$ | 0.9772 |
| MTG2011 | <i>C. gloeosporioides</i> | 0.0198 | $y=1.1303x+6.9250$ | 0.9743 |
| SW3011  | <i>C. gloeosporioides</i> | 0.0378 | $y=1.0762x+6.5301$ | 0.9671 |
| XGZ2011 | <i>C. gloeosporioides</i> | 0.0216 | $y=1.4139x+7.3528$ | 0.9892 |
| FS5011  | <i>C. siamense</i>        | 0.0265 | $y=1.2022x+6.8951$ | 0.9177 |
| FS5021  | <i>C. siamense</i>        | 0.0216 | $y=1.1700x+6.9489$ | 0.9616 |
| FSG1021 | <i>C. siamense</i>        | 0.0128 | $y=0.9233x+6.7454$ | 0.9764 |
| JF2011  | <i>C. siamense</i>        | 0.0156 | $y=1.3182x+7.3793$ | 0.9950 |
| JF2131  | <i>C. siamense</i>        | 0.0183 | $y=0.8590x+6.4917$ | 0.9644 |
| JF2321  | <i>C. siamense</i>        | 0.0231 | $y=1.1494x+6.8808$ | 0.9305 |
| JFG1011 | <i>C. siamense</i>        | 0.0135 | $y=1.5190x+7.8390$ | 0.9976 |
| JFG1041 | <i>C. siamense</i>        | 0.0213 | $y=1.0781x+6.8011$ | 0.9817 |
| JFG2041 | <i>C. siamense</i>        | 0.0146 | $y=0.9889x+6.8144$ | 0.9909 |
| SW1021  | <i>C. siamense</i>        | 0.0201 | $y=1.1451x+6.9412$ | 0.9937 |

|                     |         |                           |        |                    |        |
|---------------------|---------|---------------------------|--------|--------------------|--------|
| Mefentrifluconazole | SW2021  | <i>C. siamense</i>        | 0.0134 | $y=1.0823x+7.0259$ | 0.9898 |
|                     | SW3031  | <i>C. siamense</i>        | 0.0198 | $y=1.1553x+6.9671$ | 0.9666 |
|                     | SWG1011 | <i>C. siamense</i>        | 0.0132 | $y=1.3675x+7.5698$ | 0.9974 |
|                     | SWG3011 | <i>C. siamense</i>        | 0.0194 | $y=0.9739x+6.6676$ | 0.9633 |
|                     | XQY1021 | <i>C. siamense</i>        | 0.0150 | $y=1.4108x+735722$ | 0.9979 |
|                     | XGZ3021 | <i>C. sojae</i>           | 0.0514 | $y=1.0450x+6.3463$ | 0.9913 |
|                     | XGZ3012 | <i>C. liaoningense</i>    | 0.3337 | $y=0.6701x+5.3194$ | 0.9842 |
|                     | XGZ3011 | <i>C. liaoningense</i>    | 0.8065 | $y=1.1495x+5.1073$ | 0.9798 |
|                     | XGZ3021 | <i>C. sojae</i>           | 1.4666 | $y=0.9985x+4.8339$ | 0.9520 |
|                     | DGZ1071 | <i>C. aenigma</i>         | 0.9266 | $y=1.2349x+5.0408$ | 0.9762 |
|                     | JZ1151  | <i>C. aenigma</i>         | 0.6915 | $y=1.2396x+5.1985$ | 0.9863 |
|                     | JF2391  | <i>C. aenigma</i>         | 0.4484 | $y=1.0016x+5.3488$ | 0.9933 |
|                     | JF2393  | <i>C. aenigma</i>         | 0.5353 | $y=1.1798x+5.3201$ | 0.9958 |
|                     | LDH3011 | <i>C. aenigma</i>         | 1.5547 | $y=1.1916x+4.7716$ | 0.9692 |
|                     | LDH4011 | <i>C. aenigma</i>         | 1.3437 | $y=0.9096x+4.8832$ | 0.9615 |
|                     | LDH7011 | <i>C. aenigma</i>         | 1.8659 | $y=1.4163x+4.6163$ | 0.9851 |
|                     | DGZ1011 | <i>C. fructicola</i>      | 0.4749 | $y=0.7953x+5.2572$ | 0.9557 |
|                     | DGZ1052 | <i>C. fructicola</i>      | 0.7778 | $y=0.8131x+5.0887$ | 0.927  |
|                     | JF2431  | <i>C. fructicola</i>      | 1.5125 | $y=0.9220x+4.8343$ | 0.9556 |
|                     | JF2432  | <i>C. fructicola</i>      | 0.2899 | $y=1.0620x+5.5710$ | 0.9866 |
|                     | JF2433  | <i>C. fructicola</i>      | 0.7418 | $y=0.7359x+5.0954$ | 0.9762 |
|                     | JZ1121  | <i>C. fructicola</i>      | 1.1066 | $y=0.8431x+4.9628$ | 0.9293 |
|                     | XGZ1021 | <i>C. fructicola</i>      | 1.1395 | $y=0.9068x+4.9485$ | 0.984  |
|                     | XGZ1021 | <i>C. fructicola</i>      | 1.1395 | $y=0.9068x+4.9485$ | 0.9840 |
|                     | JZ1121  | <i>C. fructicola</i>      | 1.1066 | $y=0.8431x+4.9628$ | 0.9293 |
|                     | JFG1051 | <i>C. gloeosporioides</i> | 0.7179 | $y=1.0287x+5.1480$ | 0.9895 |

|           |         |                           |        |                    |        |
|-----------|---------|---------------------------|--------|--------------------|--------|
| Fluazinam | LDH9011 | <i>C. gloeosporioides</i> | 0.6421 | $y=1.0090x+5.1940$ | 0.9851 |
|           | MTG1011 | <i>C. gloeosporioides</i> | 1.2843 | $y=1.1224x+4.8780$ | 0.8533 |
|           | MTG2011 | <i>C. gloeosporioides</i> | 1.2075 | $y=1.0670x+4.9126$ | 0.8482 |
|           | JZ1031  | <i>C. gloeosporioides</i> | 1.2756 | $y=1.0894x+4.8847$ | 0.9829 |
|           | XGZ2011 | <i>C. gloeosporioides</i> | 1.5522 | $y=0.3639x+4.7395$ | 0.9507 |
|           | DGZ1041 | <i>C. gloeosporioides</i> | 1.3869 | $y=0.7900x+4.8877$ | 0.9692 |
|           | FS5011  | <i>C. siamense</i>        | 1.0363 | $y=1.1858x+4.9817$ | 0.9881 |
|           | JF2011  | <i>C. siamense</i>        | 0.5067 | $y=0.8809x+5.2600$ | 0.9997 |
|           | JF2271  | <i>C. siamense</i>        | 1.1870 | $y=1.3826x+4.8970$ | 0.9612 |
|           | JF2321  | <i>C. siamense</i>        | 0.7582 | $y=1.0229x+5.1229$ | 0.9851 |
|           | JF2451  | <i>C. siamense</i>        | 1.3402 | $y=1.1473x+4.8540$ | 0.9670 |
|           | JFG1011 | <i>C. siamense</i>        | 0.4631 | $y=0.8317x+5.2780$ | 0.9923 |
|           | JFG1041 | <i>C. siamense</i>        | 0.9058 | $y=1.0694x+5.0459$ | 0.9770 |
|           | JFG2041 | <i>C. siamense</i>        | 0.9076 | $y=1.0855x+5.0456$ | 0.9700 |
|           | SW2021  | <i>C. siamense</i>        | 1.1336 | $y=1.0633x+4.9420$ | 0.9757 |
|           | SWG1011 | <i>C. siamense</i>        | 0.6751 | $y=1.0190x+5.1738$ | 0.9961 |
|           | XQY1021 | <i>C. siamense</i>        | 0.3627 | $y=1.0787x+5.4750$ | 0.9754 |
|           | XGZ3011 | <i>C. liaoningense</i>    | 0.0855 | $y=1.5342x+6.6383$ | 0.9805 |
|           | XGZ3012 | <i>C. liaoningense</i>    | 0.1309 | $y=1.5267x+6.3481$ | 0.9919 |
|           | XGZ3021 | <i>C. sojae</i>           | 0.2465 | $y=1.0420x+5.6337$ | 0.9687 |
|           | XGZ3022 | <i>C. sojae</i>           | 0.2675 | $y=1.1353x+5.6500$ | 0.9694 |
|           | JF2391  | <i>C. aenigma</i>         | 0.0529 | $y=1.8464x+7.3558$ | 0.9632 |
|           | JF2393  | <i>C. aenigma</i>         | 0.0897 | $y=0.9684x+6.0137$ | 0.9462 |
|           | LDH4011 | <i>C. aenigma</i>         | 0.0540 | $y=1.1486x+6.4555$ | 0.9786 |
|           | LDH7011 | <i>C. aenigma</i>         | 0.0617 | $y=0.8979x+6.0856$ | 0.9032 |
|           | LDH3011 | <i>C. aenigma</i>         | 0.0642 | $y=1.2386x+6.4769$ | 0.9836 |

|         |                           |        |                    |        |
|---------|---------------------------|--------|--------------------|--------|
| JZ1151  | <i>C. aenigma</i>         | 0.1009 | $y=1.1305x+6.1260$ | 0.9977 |
| DGZ1071 | <i>C. aenigma</i>         | 0.0497 | $y=1.2910x+6.6830$ | 0.9896 |
| JF2432  | <i>C. fructicola</i>      | 0.0320 | $y=1.2382x+6.8501$ | 0.9879 |
| JF2433  | <i>C. fructicola</i>      | 0.0490 | $y=1.4872x+6.9472$ | 0.9887 |
| DGZ1052 | <i>C. fructicola</i>      | 0.0587 | $y=1.4624x+6.8006$ | 0.9785 |
| DGZ1011 | <i>C. fructicola</i>      | 0.0578 | $y=1.4585x+6.8048$ | 0.9769 |
| XGZ1021 | <i>C. fructicola</i>      | 0.0507 | $y=1.4702x+6.6919$ | 0.9954 |
| JZ1121  | <i>C. fructicola</i>      | 0.0728 | $y=1.4872x+6.6919$ | 0.9987 |
| JF1021  | <i>C. gloeosporioides</i> | 0.0592 | $y=1.3484x+6.6548$ | 0.9989 |
| JF2162  | <i>C. gloeosporioides</i> | 0.0762 | $y=1.1538x+6.2903$ | 0.9805 |
| JF2271  | <i>C. gloeosporioides</i> | 0.0550 | $y=1.1105x+6.3980$ | 0.9780 |
| JFG1051 | <i>C. gloeosporioides</i> | 0.0564 | $y=0.9534x+6.1902$ | 0.9639 |
| LDH9011 | <i>C. gloeosporioides</i> | 0.0407 | $y=1.4949x+7.0780$ | 0.9706 |
| MTG1011 | <i>C. gloeosporioides</i> | 0.0766 | $y=1.1320x+6.2627$ | 0.9645 |
| MTG2011 | <i>C. gloeosporioides</i> | 0.0700 | $y=0.4952x+5.5718$ | 0.9574 |
| DGZ1041 | <i>C. gloeosporioides</i> | 0.0528 | $y=1.4104x+6.8008$ | 0.9617 |
| JZ1031  | <i>C. gloeosporioides</i> | 0.0515 | $y=1.3692x+6.7627$ | 0.9940 |
| XGZ2011 | <i>C. gloeosporioides</i> | 0.0514 | $y=1.4076x+6.8137$ | 0.9918 |
| JF2011  | <i>C. siamense</i>        | 0.0460 | $y=1.1420x+6.5266$ | 0.9833 |
| JF2451  | <i>C. siamense</i>        | 0.0709 | $y=0.8580x+5.9858$ | 0.9751 |
| JFG1011 | <i>C. siamense</i>        | 0.0376 | $y=1.2941x+6.8436$ | 0.9804 |
| JFG1041 | <i>C. siamense</i>        | 0.0550 | $y=0.9657x+6.2164$ | 0.9848 |
| SW1021  | <i>C. siamense</i>        | 0.0652 | $y=0.8188x+5.9710$ | 0.9214 |
| SW2021  | <i>C. siamense</i>        | 0.0686 | $y=0.9105x+6.0595$ | 0.9302 |
| SWG1011 | <i>C. siamense</i>        | 0.0386 | $y=1.3034x+6.8423$ | 0.9670 |
| SWG1031 | <i>C. siamense</i>        | 0.0877 | $y=0.8406x+5.7861$ | 0.9204 |



|              |         |                           |        |                    |        |
|--------------|---------|---------------------------|--------|--------------------|--------|
| Tebuconazole | SWG3011 | <i>C. siamense</i>        | 0.0491 | $y=0.8470x+6.1089$ | 0.9915 |
|              | XQY1021 | <i>C. siamense</i>        | 0.0292 | $y=1.3750x+7.1086$ | 0.9932 |
|              | XGZ3011 | <i>C. liaoningense</i>    | 0.2516 | $y=1.0001x+5.5992$ | 0.9990 |
|              | XGZ3021 | <i>C. sojae</i>           | 0.6900 | $y=1.1731x+5.1889$ | 0.9978 |
|              | JF2391  | <i>C. aenigma</i>         | 1.0539 | $y=0.9307x+4.9787$ | 0.9916 |
|              | JF2393  | <i>C. aenigma</i>         | 0.9307 | $y=0.8309x+5.0258$ | 0.9888 |
|              | LDH4011 | <i>C. aenigma</i>         | 1.6444 | $y=1.0289x+4.7777$ | 0.9885 |
|              | LDH7011 | <i>C. aenigma</i>         | 1.2450 | $y=0.7223x+4.9312$ | 0.9282 |
|              | DGZ1071 | <i>C. aenigma</i>         | 0.3027 | $y=1.0299x+5.5344$ | 0.9950 |
|              | LDH3011 | <i>C. aenigma</i>         | 0.4367 | $y=0.8224x+5.2959$ | 0.9597 |
|              | JZ1151  | <i>C. aenigma</i>         | 0.2025 | $y=1.0121x+5.7019$ | 0.9953 |
|              | JF2431  | <i>C. fruticola</i>       | 0.0701 | $y=0.8143x+4.9760$ | 0.9938 |
|              | XGZ1021 | <i>C. fruticola</i>       | 0.3277 | $y=1.0120x+5.4903$ | 0.9988 |
|              | JZ1121  | <i>C. fruticola</i>       | 0.3673 | $y=0.9998x+5.4348$ | 0.9989 |
|              | DGZ1011 | <i>C. fruticola</i>       | 0.1256 | $y=0.9766x+5.8797$ | 0.9956 |
|              | DGZ1052 | <i>C. fruticola</i>       | 0.1768 | $y=1.0163x+5.7647$ | 0.9997 |
|              | JF1022  | <i>C. gloeosporioides</i> | 1.4813 | $y=1.1185x+4.8091$ | 0.9889 |
|              | JF2161  | <i>C. gloeosporioides</i> | 0.9357 | $y=1.5565x+5.0449$ | 0.9835 |
|              | JF2411  | <i>C. gloeosporioides</i> | 0.5970 | $y=1.2279x+5.2750$ | 0.9976 |
|              | JFG1051 | <i>C. gloeosporioides</i> | 0.7352 | $y=0.9275x+5.1238$ | 0.9995 |
|              | MTG1011 | <i>C. gloeosporioides</i> | 0.6102 | $y=0.9726x+5.2085$ | 0.9967 |
|              | MTG2011 | <i>C. gloeosporioides</i> | 0.8681 | $y=1.4859x+5.0912$ | 0.9779 |
|              | JZ1031  | <i>C. gloeosporioides</i> | 0.2368 | $y=1.1844x+5.7408$ | 0.9848 |
|              | XGZ2011 | <i>C. gloeosporioides</i> | 0.2985 | $y=1.2513x+5.6569$ | 0.9927 |
|              | DGZ1041 | <i>C. gloeosporioides</i> | 0.2659 | $y=0.9000x+5.5177$ | 0.9959 |
|              | FS5021  | <i>C. siamense</i>        | 0.6758 | $y=0.9758x+5.1451$ | 0.9975 |

|               |         |                           |        |                    |        |
|---------------|---------|---------------------------|--------|--------------------|--------|
| Epoxiconazole | FSG1021 | <i>C. siamense</i>        | 0.8379 | $y=1.1396x+5.0875$ | 0.9990 |
|               | JF2011  | <i>C. siamense</i>        | 0.8002 | $y=1.0021x+5.0970$ | 0.9961 |
|               | JF2131  | <i>C. siamense</i>        | 0.7352 | $y=0.9275x+5.1238$ | 0.9995 |
|               | JF2271  | <i>C. siamense</i>        | 0.5124 | $y=1.2155x+5.3529$ | 0.9931 |
|               | JF2321  | <i>C. siamense</i>        | 0.7989 | $y=0.8428x+5.0821$ | 0.9984 |
|               | JF2451  | <i>C. siamense</i>        | 0.5566 | $y=1.2867x+5.3273$ | 0.9942 |
|               | JFG1041 | <i>C. siamense</i>        | 0.6226 | $y=0.8911x+5.1833$ | 0.9941 |
|               | JFG2041 | <i>C. siamense</i>        | 0.7511 | $y=0.8928x+5.1109$ | 0.9922 |
|               | SW1021  | <i>C. siamense</i>        | 0.9411 | $y=0.9904x+5.0260$ | 0.9967 |
|               | SW2021  | <i>C. siamense</i>        | 0.7793 | $y=0.8628x+5.0934$ | 0.9982 |
|               | SWG1031 | <i>C. siamense</i>        | 0.6816 | $y=0.8358x+5.1391$ | 0.9888 |
|               | XGZ3011 | <i>C. liaoningense</i>    | 0.2288 | $y=1.2600x+5.8069$ | 0.9995 |
|               | XGZ3021 | <i>C. sojae</i>           | 0.6782 | $y=1.4747x+5.2486$ | 0.9922 |
|               | DGZ1071 | <i>C. aenigma</i>         | 0.3469 | $y=1.5551x+5.7148$ | 0.9985 |
|               | JF2391  | <i>C. aenigma</i>         | 0.3708 | $y=1.4020x+5.6039$ | 0.9897 |
|               | JF2392  | <i>C. aenigma</i>         | 0.3215 | $y=1.5305x+5.7541$ | 0.9928 |
|               | JZ1151  | <i>C. aenigma</i>         | 0.1582 | $y=1.2490x+6.0001$ | 0.9757 |
|               | LDH4012 | <i>C. aenigma</i>         | 0.4115 | $y=1.5224x+5.5870$ | 0.9836 |
|               | LDH3011 | <i>C. aenigma</i>         | 0.4562 | $y=1.0944x+5.4070$ | 0.9908 |
|               | DGZ1011 | <i>C. fruticola</i>       | 0.2909 | $y=1.1466x+5.6149$ | 0.9998 |
|               | DGZ1052 | <i>C. fruticola</i>       | 0.2937 | $y=1.1359x+5.6043$ | 0.9974 |
|               | JF2431  | <i>C. fruticola</i>       | 0.2703 | $y=1.1578x+5.6577$ | 0.9993 |
|               | JF2432  | <i>C. fruticola</i>       | 0.2707 | $y=1.1851x+5.6724$ | 0.9972 |
|               | JZ1121  | <i>C. fruticola</i>       | 0.3344 | $y=1.2128x+5.5769$ | 0.9945 |
|               | XGZ1021 | <i>C. fruticola</i>       | 0.2887 | $y=1.2258x+5.6612$ | 0.9967 |
|               | DGZ1041 | <i>C. gloeosporioides</i> | 0.3142 | $y=1.2153x+5.6109$ | 0.9830 |

|           |         |                           |        |                    |        |
|-----------|---------|---------------------------|--------|--------------------|--------|
| SYP-14288 | DHS1011 | <i>C. gloeosporioides</i> | 0.4639 | $y=1.8798x+5.6269$ | 0.9935 |
|           | JF1021  | <i>C. gloeosporioides</i> | 0.5992 | $y=1.3749x+5.3057$ | 0.9821 |
|           | JFG1051 | <i>C. gloeosporioides</i> | 0.2813 | $y=1.3156x+5.2746$ | 0.9967 |
|           | SW1011  | <i>C. gloeosporioides</i> | 0.1911 | $y=1.2818x+5.9211$ | 0.9984 |
|           | XGZ2011 | <i>C. gloeosporioides</i> | 0.2826 | $y=1.5744x+5.8638$ | 0.9920 |
|           | DHS2031 | <i>C. siamense</i>        | 0.1718 | $y=1.2134x+5.9279$ | 0.9580 |
|           | FS5012  | <i>C. siamense</i>        | 0.1223 | $y=1.0888x+5.9934$ | 0.9945 |
|           | FSG1022 | <i>C. siamense</i>        | 0.1647 | $y=1.4943x+6.1702$ | 0.9974 |
|           | JF2011  | <i>C. siamense</i>        | 0.1476 | $y=1.2719x+6.0567$ | 0.9985 |
|           | JFG1011 | <i>C. siamense</i>        | 0.1232 | $y=1.1994x+6.0904$ | 0.9935 |
|           | PG5031  | <i>C. siamense</i>        | 0.2392 | $y=1.3992x+5.8691$ | 0.9829 |
|           | ST1022  | <i>C. siamense</i>        | 0.1634 | $y=1.2365x+5.9726$ | 0.9765 |
|           | SWG1011 | <i>C. siamense</i>        | 0.1722 | $y=1.3765x+6.0515$ | 0.9938 |
|           | XQY1021 | <i>C. siamense</i>        | 0.1263 | $y=1.1953x+6.0739$ | 0.9987 |
|           | XGZ3011 | <i>C. liaoningense</i>    | 0.0227 | $y=1.7127x+7.8139$ | 0.9810 |
|           | XGZ3021 | <i>C. sojae</i>           | 0.0414 | $y=1.9385x+7.6806$ | 0.9795 |
|           | DGZ1071 | <i>C. aenigma</i>         | 0.0102 | $y=0.9357x+6.8596$ | 0.9342 |
|           | JF2391  | <i>C. aenigma</i>         | 0.0124 | $y=1.0537x+7.0072$ | 0.9541 |
|           | JF2392  | <i>C. aenigma</i>         | 0.0101 | $y=0.9698x+6.9315$ | 0.9759 |
|           | JZ1151  | <i>C. aenigma</i>         | 0.0114 | $y=1.2184x+7.3665$ | 0.9756 |
|           | LDH3011 | <i>C. aenigma</i>         | 0.0105 | $y=0.8625x+6.7063$ | 0.9616 |
|           | LDH4012 | <i>C. aenigma</i>         | 0.0097 | $y=0.8749x+6.7606$ | 0.9708 |
|           | DGZ1011 | <i>C. fructicola</i>      | 0.0110 | $y=1.0928x+7.1377$ | 0.9373 |
|           | DGZ1052 | <i>C. fructicola</i>      | 0.0061 | $y=1.0033x+7.2193$ | 0.9574 |
|           | JF2431  | <i>C. fructicola</i>      | 0.0108 | $y=1.3269x+7.6085$ | 0.9785 |
|           | JF2432  | <i>C. fructicola</i>      | 0.0098 | $y=1.2408x+7.4888$ | 0.9546 |

|         |                           |        |                    |        |
|---------|---------------------------|--------|--------------------|--------|
| JFG1011 | <i>C. fruticola</i>       | 0.0131 | $y=0.8002x+6.5053$ | 0.9855 |
| JZ1121  | <i>C. fruticola</i>       | 0.0102 | $y=1.2577x+7.4995$ | 0.9688 |
| XGZ1021 | <i>C. fruticola</i>       | 0.0061 | $y=1.0647x+7.3537$ | 0.9881 |
| DGZ1041 | <i>C. gloeosporioides</i> | 0.0133 | $y=0.6280x+6.1774$ | 0.9642 |
| DHS1011 | <i>C. gloeosporioides</i> | 0.0115 | $y=0.9920x+6.9929$ | 0.9859 |
| JF1021  | <i>C. gloeosporioides</i> | 0.0325 | $y=0.9794x+6.4562$ | 0.9423 |
| JFG1051 | <i>C. gloeosporioides</i> | 0.0119 | $y=0.5553x+6.0680$ | 0.9193 |
| JZ1031  | <i>C. gloeosporioides</i> | 0.0137 | $y=0.8211x+6.5290$ | 0.9520 |
| SW1011  | <i>C. gloeosporioides</i> | 0.0134 | $y=0.9588x+6.7949$ | 0.9842 |
| XGZ2011 | <i>C. gloeosporioides</i> | 0.0260 | $y=0.7927x+6.2561$ | 0.9268 |
| DHS2031 | <i>C. siamense</i>        | 0.0254 | $y=0.8819x+6.4066$ | 0.9549 |
| FS5012  | <i>C. siamense</i>        | 0.0222 | $y=1.0095x+6.6688$ | 0.9810 |
| FSG1022 | <i>C. siamense</i>        | 0.0133 | $y=1.0414x+6.9509$ | 0.9754 |
| JF2011  | <i>C. siamense</i>        | 0.0169 | $y=0.8668x+6.5340$ | 0.9227 |
| PG5031  | <i>C. siamense</i>        | 0.0245 | $y=1.4976x+7.4116$ | 0.9552 |
| ST1022  | <i>C. siamense</i>        | 0.0159 | $y=1.0878x+6.9551$ | 0.9598 |
| SWG1011 | <i>C. siamense</i>        | 0.0198 | $y=0.8724x+6.4853$ | 0.9421 |
| XQY1021 | <i>C. siamense</i>        | 0.0115 | $y=0.9715x+6.8834$ | 0.9776 |
